1 **TITLE:** *Saccharomyces cerevisiae* Ecm2 Modulates the Catalytic Steps of pre-mRNA  
2 Splicing

3 **Authors:** Clarisse van der Feltz<sup>1</sup>, Brandon Nikolai<sup>1</sup>, Charles Schneider<sup>1</sup>, Joshua C.  
4 Paulson<sup>1</sup>, Xingyang Fu<sup>2</sup>, and Aaron A. Hoskins<sup>1,2\*</sup>

5 **CORRESPONDING AUTHOR:**

6 \*Aaron A. Hoskins, [ahoskins@wisc.edu](mailto:ahoskins@wisc.edu)

7 **AFFILIATIONS:**

8 <sup>1</sup> Department of Biochemistry, U. Wisconsin-Madison, Madison, WI 53706

9 <sup>2</sup> Department of Chemistry, U. Wisconsin-Madison, Madison, WI 53706

10

11 **RUNNING TITLE:** Multiple Functions of Ecm2 During Splicing

12 **KEYWORDS:** Splicing, Spliceosome, Ecm2, yeast, RNA

## 13 **ABSTRACT**

14 Genetic, biochemical, and structural studies have elucidated the molecular basis  
15 for spliceosome catalysis. Splicing is RNA catalyzed and the essential snRNA and  
16 protein factors are well-conserved. However, little is known about how non-essential  
17 components of the spliceosome contribute to the reaction and modulate the activities of  
18 the fundamental core machinery. Ecm2 is a non-essential yeast splicing factor that is a  
19 member of the Prp19-related complex of proteins. Cryo-electron microscopy (cryo-EM)  
20 structures have revealed that Ecm2 binds the U6 snRNA and is entangled with Cwc2,  
21 another non-essential factor that promotes a catalytically active conformation of the  
22 spliceosome. These structures also indicate that Ecm2 and the U2 snRNA likely form a  
23 transient interaction during 5' splice site (SS) cleavage. We have characterized genetic  
24 interactions between ECM2 and alleles of splicing factors that alter the catalytic steps in  
25 splicing. In addition, we have studied how loss of ECM2 impacts splicing of pre-mRNAs  
26 containing non-consensus or competing SS. Our results show that ECM2 functions  
27 during the catalytic stages of splicing. It facilitates the formation and stabilization of the  
28 1<sup>st</sup>-step catalytic site, promotes 2<sup>nd</sup>-step catalysis, and permits alternate 5' SS usage.  
29 We propose that Cwc2 and Ecm2 can each fine-tune the spliceosome active site in  
30 unique ways. Their interaction network may act as a conduit through which splicing of  
31 certain pre-mRNAs, such as those containing weak or alternate splice sites, can be  
32 regulated.

33

34

## 35 INTRODUCTION

36 Spliceosomes are composed of small ribonucleoprotein particles (snRNPs), each  
37 containing proteins and a small nuclear RNA (U1, U2, U4, U5, or U6 snRNA), and  
38 dozens of additional protein splicing factors. Spliceosomes assemble from these factors  
39 before undergoing a number of conformational changes to form a catalytic center  
40 (activation) capable of carrying out the chemical steps of splicing (**Fig. 1A**): 5' splice site  
41 (SS) cleavage (1<sup>st</sup> step) and exon ligation (2<sup>nd</sup> step). Significant genetic, biochemical,  
42 and structural work over the past few decades has provided a wealth of information into  
43 how essential components of the splicing reaction such as the snRNAs, Prp8 protein,  
44 and DExD/H-box ATPases promote splicing (Wahl et al. 2009; Yan et al. 2019;  
45 Plaschka et al. 2019; Kastner et al. 2019; Mayerle and Guthrie 2017). In comparison,  
46 much less is known about how non-essential factors modulate the splicing reaction and  
47 interact with the core machinery.

48 Several of the non-essential splicing factors in yeast are associated with the  
49 Prp19-containing complex (NTC). Indeed, of 26 yeast proteins categorized as core-NTC  
50 components or NTC-associated, 12 are non-essential (Hogg et al. 2010, 2014). Despite  
51 not being critical for growth, many of these proteins are well-conserved and have  
52 human splicing factor homologs. In general, the NTC is thought to stabilize catalytic  
53 conformations of the U6 snRNA and contribute to splicing fidelity (Hogg et al. 2010).  
54 Consistent with this model, cryo-EM structures and biochemical assays have shown  
55 that several non-essential NTC proteins directly interact with U6 including Cwc2, Ecm2,  
56 and Isy1 (Plaschka et al. 2019; Hogg et al. 2010; McGrail et al. 2009; Villa and Guthrie  
57 2005; Rasche et al. 2012). Exactly how the NTC modulates RNA interactions within the

58 spliceosome is not yet clear (Hogg et al. 2010), and it is difficult to infer potential  
59 mechanisms and the impact of mutations from cryo-EM structures alone (Mayerle and  
60 Guthrie 2017).

61 The NTC-associated protein Ecm2 was first isolated in a synthetic lethality  
62 screen for genetic interactors with U2 snRNA mutations (synthetic lethality with U2/*slt*  
63 screen) (Xu et al. 1998). This screen identified *slt11/ecm2* as well as other splicing  
64 factors including Prp8 and Brr2. Additional work demonstrated genetic interactions  
65 between *ecm2* and multiple components of the spliceosome but especially U2/U6 helix I  
66 and helix II mutants (Xu and Friesen 2001; Xu et al. 1998). Biochemical assays of  
67 splicing and spliceosome assembly showed that absence of Ecm2 results in loss of  
68 splicing activity at high temperatures and a block in spliceosome activation (Xu and  
69 Friesen 2001). Since it was known that U2/U6 form an intermolecular duplex during the  
70 early stages of activation (helix II) (Wassarman and Steitz 1992), it was proposed that  
71 Ecm2 functions during spliceosome activation to facilitate formation this duplex (Xu and  
72 Friesen 2001).

73 Structures of Ecm2 integrated into a number of spliceosome complexes have  
74 been determined by cryo-EM (Plaschka et al. 2019). Ecm2 contains two RNA binding  
75 domains separated by a linker: an N-terminal zinc finger motifs (ZNF) domain and a C-  
76 terminal RNA recognition motif (RRM) (**Fig. 1B**). Unexpectedly, Ecm2 does not directly  
77 bind U2/U6 helix II. Rather the ZNF domain interacts with the U6 nucleotides (nt) 29-32,  
78 which are located between the U6 5' stem loop and the ACAGAGA-box/5' SS pairing  
79 region (**Fig. 1C**). Ecm2 is also intertwined with another NTC-associated protein, Cwc2.

80 Cwc2 contacts both the intronic RNA downstream of the 5' SS and the U6 snRNA at  
81 multiple locations.

82 Interestingly, the C-terminal RRM of Ecm2 closely approaches U2 snRNA stem  
83 IIb in the C complex spliceosome (**Fig. 1C**). Due to low resolution within this region, the  
84 exact molecular contacts between the RRM, U2 stem IIb, and nearby regions of Cwc2  
85 are unclear. This interaction is likely transient: the Ecm2/U2 interaction has only been  
86 observed in structures captured just before (B\* complex) and after (C complex) the 1<sup>st</sup>  
87 step of splicing (Galej et al. 2016; Wan et al. 2019). Large conformational changes  
88 place U2 stem IIb far away from any possible Ecm2 interaction in other structures (**Fig.**  
89 **1A, C**) (Rauhut et al. 2016; Yan et al. 2016a, 2016b; Fica et al. 2017). Toggling of  
90 Ecm2/U2 stem IIb contacts on-or-off in different complexes resembles structural toggle  
91 switches reported for other splicing factors. These include the RNaseH domain of Prp8,  
92 the U4/U6 di-snRNA, as well as interconversion of U2 stem II itself between two  
93 mutually exclusive structures: stem IIa/b and stem IIb/c (Perriman and Ares 2010, 2007;  
94 Hilliker et al. 2007; Mayerle et al. 2017; Abelson 2017; Rodgers et al. 2015, 2016). The  
95 significance of the Ecm2/stem IIb interaction has not been studied.

96 Human spliceosomes do not contain direct homologs of Cwc2 and Ecm2.  
97 Instead, a single protein, RBM22, binds the U6 snRNA at the corresponding positions.  
98 Based on limited sequence homology, it has previously been proposed that RBM22  
99 represents a fusion of Cwc2 and Ecm2 (Rasche et al. 2012). This is supported by  
100 biochemical studies that show a similar function for Cwc2 and RBM22 in stabilizing the  
101 spliceosome active site (Hogg et al. 2014; McGrail et al. 2009; Rasche et al. 2012). In  
102 addition, both Cwc2 and RBM22 interact with intronic RNA at a location downstream of

103 the 5'SS (Kastner et al. 2019; Rasche et al. 2012). Whether or not Ecm2 and RBM22  
104 also share any conserved functions is unknown.

105 We have studied the genetic interactions between Ecm2 and splicing factors  
106 capable of modulating the 1<sup>st</sup> and 2<sup>nd</sup> steps of splicing including the Prp2 and Prp16  
107 ATPases, Prp8, and U6 snRNA. Ecm2 exhibits genetic interactions with mutations that  
108 disrupt U2 stem II toggling, consistent with a functional interaction between the protein  
109 and U2. Genetic deletion of ECM2 changes how pre-mRNAs containing non-consensus  
110 splice sites are processed, implicating Ecm2 in the catalytic steps of splicing in addition  
111 to its role in activation. Our results support a model in which Ecm2 has distinct  
112 functions for each catalytic step and are consistent with a proposal that several non-  
113 essential splicing factors (Ecm2, Cwc2, Isy1) function as a hub for regulating  
114 spliceosome catalysis (Hogg et al. 2010). These results have implications for the  
115 function of RBM22 in human spliceosomes as well as for how RBM22/intronic RNA  
116 interactions are formed.

## 117 **RESULTS**

### 118 **The Ecm2 U6-Binding Domain is Insufficient to Rescue Yeast Growth at 37°C**

119 Previous studies of Ecm2 reported that *ecm2Δ* yeast exhibited a strong  
120 temperature-sensitive (*ts*) phenotype with significantly reduced or no growth at  
121 temperatures above 33°C (Xu and Friesen 2001). We replicated this result by deleting  
122 *ECM2* from a haploid strain of yeast and introducing plasmids containing *ecm2* variants  
123 under control of their endogenous promoters. As expected, *ecm2Δ* yeast containing an  
124 empty plasmid grew well at permissive temperatures (16-30°C) but possessed a severe

125 *ts* phenotype at 37°C (**Fig. 1D**). When we included a plasmid containing the wild type  
126 (WT) *ECM2* gene, the *ts* phenotype was corrected, and growth was restored at 37°C.

127 To test if the N-terminal, U6-binding binding domain of Ecm2 alone was capable  
128 of rescuing the *ts* phenotype, we used recent cryo-EM structures of yeast spliceosomes  
129 to design truncation mutants of Ecm2. Nonsense mutations were incorporated at amino  
130 acids 144, 198, 266, and 326 to allow for expression of variants containing only the U6-  
131 binding ZNF domain (Ecm2<sup>1-143</sup>), the ZNF domain plus the inter-domain linker (Ecm2<sup>1-  
132 197</sup>), the ZNF and a partial U2-binding, RRM domain (lacking amino acids that come  
133 nearest to U2, Ecm2<sup>1-265</sup>), or the complete ZNF and RRM domains truncated at the last  
134 amino acid modeled into cryo-EM density but missing the C-terminal lysine-rich region  
135 (Ecm2<sup>1-325</sup>, **Fig. 1D**). Variants containing the U6-binding, ZNF domain but not the RRM  
136 were able to partially rescue the *ts* phenotype but still grew poorly at 37°C. Inclusion of  
137 the entire U2-binding, RRM (Ecm2<sup>1-325</sup>) resulted in more significant suppression of the *ts*  
138 phenotype; although, cells still grew more slowly than those containing Ecm2<sup>WT</sup>. These  
139 data are consistent with the U6-binding, ZNF domain alone being unable to completely  
140 restore Ecm2 function and the U2-binding, RRM domain contributing to this function.

#### 141 **Genetic Interactions between Ecm2 and the Prp2 and Prp16 ATPases**

142 Xu and Friesen provided ample evidence that Ecm2 plays a role in spliceosome  
143 activation (Xu and Friesen 2001). We and others have previously noted that key players  
144 in the activation process such as the U2 snRNP protein Hsh155/SF3B1 and U2/U6 helix  
145 I exhibit genetic interactions with a cold-sensitive (*cs*) mutant of the DEAH-box ATPase  
146 Prp2 (Prp2<sup>Q548N</sup>) (Kaur et al. 2020; Carrocci et al. 2017; Wlodaver and Staley 2014).  
147 Prp2 binds the intronic RNA downstream of the branch site and uses ATP hydrolysis to

148 trigger release of Hsh155/SF3B1 and other U2 snRNP proteins during activation  
149 (Lardelli et al. 2010; van der Feltz and Hoskins 2019). We tested if *ecm2Δ* would also  
150 show a genetic interaction with Prp2<sup>Q548N</sup>. When we combined Prp2<sup>Q548N</sup> with  
151 *ecm2Δ*, we observed no growth at low or high temperatures (16, 23, or 37°C) and  
152 reduced growth at 30°C (**Fig. 2A**). Prp2<sup>Q548N</sup> is synthetic lethal with *ecm2Δ* at low  
153 temperatures and Prp2<sup>Q548N</sup> does not rescue the *ts* phenotype of *ecm2Δ*. This genetic  
154 interaction is consistent with Ecm2's function in promoting spliceosome activation.

155 We next tested if other spliceosome DEAH-box ATPases would also show  
156 genetic interactions with *ecm2Δ* or if these results were specific to Prp2<sup>Q548N</sup>. We  
157 combined *ecm2Δ* with a *cs* mutation of the ATPase Prp16 (Prp16<sup>R686I</sup>) or a *cs* and *ts*  
158 mutation of the ATPase Prp22 (Prp22<sup>T637A</sup>). Prp16 uses ATP hydrolysis to promote  
159 conformational changes of the spliceosome and splicing factor release during  
160 remodeling of the active site from the 1<sup>st</sup> to 2<sup>nd</sup> catalytic step (**Fig. 1A**) (Semlow et al.  
161 2016; Plaschka et al. 2019; Schwer and Guthrie 1992). Prp16<sup>R686I</sup> likely impedes this  
162 transition since this mutation is rescued by alleles of Prp8 that promote exon ligation  
163 (2<sup>nd</sup>-step alleles, discussed below) (Query and Konarska 2004). Prp22 also uses ATP  
164 hydrolysis to promote conformational change that enables release of the spliced mRNA  
165 product from the active site (**Fig. 1A**) (Semlow et al. 2016; Plaschka et al. 2019; Schwer  
166 2008; Wagner et al. 1998). In this case, Prp22<sup>T637A</sup> likely impedes mRNA release and  
167 transition of the active site out of the exon ligation conformation since this mutation is  
168 exacerbated by 2<sup>nd</sup>-step alleles of Prp8 (Query and Konarska 2012).

169 When Prp16<sup>R686I</sup> was combined with *ecm2Δ*, the *cs* phenotype of Prp16<sup>R686I</sup> was  
170 suppressed and growth was restored at 16°C (**Fig. 2B**). Yeast containing both



171 Prp16<sup>R686I</sup> and *ecm2Δ* also grew at 23 and 30°C, albeit less well than when WT alleles  
172 were present. In addition, Prp16<sup>R686I</sup> exacerbated the *ts* phenotype at 37°C of *ecm2Δ*  
173 yeast. This indicates some degree of synthetic lethality between *ECM2* and *PRP16* at  
174 high temperatures and is consistent a previous report of synthetic lethality between the  
175 *slt11-1* and *prp16-1* alleles (Xu et al. 1998). On the other hand, the *cs* phenotype of  
176 Prp22<sup>T637A</sup> was not suppressed by deletion of *ecm2* (**Fig. 2C**). Yeast containing both  
177 Prp22<sup>T637A</sup> and *ecm2Δ* grew very poorly at 37°C, and it was difficult to determine if  
178 Prp22<sup>T637A</sup> was a weak suppressor of the *ts* phenotype of *ecm2Δ* yeast. In sum, these  
179 data strongly support genetic interactions between *ecm2Δ* and the Prp2 and Prp16  
180 ATPases. Loss of Ecm2 exacerbates a *cs* defect in spliceosome activation caused by  
181 Prp2<sup>Q548N</sup> and suppresses a *cs* defect in the 1<sup>st</sup>-to-2<sup>nd</sup> step conformational change  
182 caused by Prp16<sup>R686I</sup>.

### 183 Genetic Interactions between Ecm2 and Mutations in U2 snRNA Stem II

184 The above results are consistent with a model in which Ecm2 stabilizes the 1<sup>st</sup>-  
185 step conformation of the spliceosome: aiding its formation during Prp2-initiated  
186 activation and inhibiting its remodeling by Prp16. To gain further insight into Ecm2's role  
187 during these steps, we combined *ecm2Δ* with mutations in the stem II region of the U2  
188 snRNA which undergo a conformational change during activation. This region of U2  
189 includes stem IIa/c as well as stem IIb—the RNA contacted by the C-terminal RRM of  
190 Ecm2 in cryo-EM structures of B\* and C complex spliceosomes (**Fig. 1C**).

191 During activation, stem II undergoes a reversible conformational change from the  
192 stem IIa to the stem IIc structure, while stem IIb remains intact (**Fig. 3A**) (van der Feltz  
193 and Hoskins 2019). 5' SS cleavage is inhibited when formation of stem IIc is blocked by

194 deletion of the 3' stem ( $\Delta$ CC) or destabilized by mutation (Hilliker et al. 2007; Perriman  
195 and Ares 2007). In contrast, stabilization of stem IIc with additional base pairs (IIc+)  
196 promotes the 1<sup>st</sup> step of splicing (Perriman and Ares 2007). Like *ecm2 $\Delta$* , mutations that  
197 destabilize stem IIc or disrupt an interaction that is physically mutually exclusive with  
198 stem IIa also suppress Prp16 mutants defective in remodeling the 1<sup>st</sup>-step spliceosome  
199 active site (Hilliker et al. 2007; Perriman and Ares 2007). We predicted that if Ecm2 is  
200 facilitating activation by assisting stem IIc formation, then deletion of *ECM2* should  
201 exacerbate the phenotypes of mutants that antagonize stem IIc.

202         The U2-2,4 and  $\Delta$ CC mutations both disrupt stem IIc formation: U2-2,4 stabilizes  
203 the competing stem IIa structure while  $\Delta$ CC prevents stem IIc formation entirely by  
204 deletion of the nucleotides that comprise the 3' half of stem IIc (**Fig. 3A**) (Perriman and  
205 Ares 2007). These mutations have little phenotypic effect by themselves in our assay.  
206 However, when combined with *ecm2 $\Delta$*  these mutations caused synthetic lethality at  
207 30°C and *cs* phenotypes at 16 and 23°C (**Fig. 3B**). These results agree with our  
208 prediction that Ecm2 facilitates stem IIc formation.

209         This model also predicts that mutations in stem II that promote stem IIc formation  
210 may be able to suppress the *ts* phenotype of *ecm2 $\Delta$*  yeast. The G53A and IIc+ mutants  
211 both favor stem IIc: G53A destabilizes the competing stem IIa structure while IIc+  
212 extends base pairing of IIc (**Fig. 3A**) (Perriman and Ares 2007). These U2 mutants  
213 exhibit phenotypes even in the presence of Ecm2: both are *cs* while IIc+ also exhibits a  
214 modest growth defect at 30 and 37°C. Neither mutation suppressed the *ts* phenotype of  
215 *ecm2 $\Delta$*  yeast, and *ecm2 $\Delta$*  exacerbated the *cs* phenotypes of both mutations. These  
216 latter results could mean that Ecm2 has additional functions in the spliceosome while

217 stem IIa is present or that snRNA structures containing these mutations are also  
218 disruptive for growth at lower temperatures in the absence of Ecm2.

219 If Ecm2 functions to assist stem IIc formation during activation, it is possible that  
220 this occurs through capture of stem IIb by the C-terminal RRM of Ecm2 during the B<sup>act</sup>  
221 to B\* complex transition. Stem IIb is non-essential in yeast (Ares and Igel 1990), and we  
222 tested if deletion of stem IIb ( $\Delta$ IIb) resulted in a similar *ts* phenotype as *ecm2* $\Delta$ . The  $\Delta$ IIb  
223 mutant yeast were not *ts* and exhibited minimal or no temperature-dependent  
224 phenotypes (**Fig. 3B**). The *ts* phenotype at 37°C of *ecm2* $\Delta$  was still observed when  
225 combined with the U2  $\Delta$ IIb mutation, and yeast containing both *ecm2* $\Delta$  and U2  $\Delta$ IIb grew  
226 similarly at other temperatures. This indicates that disruption of the Ecm2-RRM/stem IIb  
227 interaction is not solely responsible for the *ts* phenotype in *ecm2* $\Delta$  yeast.

## 228 **Ecm2 Impacts Splicing of Reporter pre-mRNAs Containing Non-consensus SS**

229 We next studied how Ecm2 influences splicing catalysis *in vivo* with the ACT1-  
230 CUP1 splicing reporter (**Fig. 4A**). In this assay, splicing of the ACT1-CUP1 pre-mRNA is  
231 necessary for growth of a Cu<sup>2+</sup> sensitive yeast strain on Cu<sup>2+</sup>-containing media. The  
232 highest [Cu<sup>2+</sup>] at which growth is observed is proportional to the amount of spliced  
233 mRNA in the cell (Lesser and Guthrie 1993). In the presence of an ACT1-CUP1 reporter  
234 containing consensus SS, we observed no difference in Cu<sup>2+</sup> tolerance between strains  
235 with or without *ECM2*. We used a primer extension assay to confirm that the similar  
236 Cu<sup>2+</sup> tolerance results were correlated with high splicing efficiencies for both catalytic  
237 steps in the presence or absence of Ecm2 (**Supplemental Fig. S1**). This indicates that  
238 splicing can still occur efficiently in the absence of Ecm2 and is consistent with lack of a  
239 significant growth phenotype in *ecm2* $\Delta$  strains at 30°C in our assays.

240 We then assayed splicing in *ecm2Δ* yeast using ACT1-CUP1 reporters harboring  
241 substitutions at the SS. The most significant decreases in Cu<sup>2+</sup> tolerance were  
242 observed using reporters containing the A3C substitution at the 5' SS, substitutions of  
243 the branch point adenosine (A259C or A259G), or substitutions flanking the branch  
244 point (U257C and C260G) (**Fig. 4B**). The large impact of *ecm2Δ* on A3C reporter  
245 splicing was intriguing since this substitution is only limiting for the 2<sup>nd</sup> catalytic step (Liu  
246 et al. 2007; Eysmont et al. 2019). Primer extension analysis of 1<sup>st</sup>- and 2<sup>nd</sup>-step splicing  
247 products confirmed a strong defect in exon ligation for the A3C reporter in the absence  
248 of Ecm2 (**Supplemental Fig. S1**). Ecm2 can therefore have opposing effects on the  
249 2<sup>nd</sup>-step active site: it can inhibit its formation but also promote 2<sup>nd</sup>-step catalysis on a  
250 substrate containing the A3C 5' SS substitution. It is possible that Ecm2 has distinct  
251 functions in both spliceosome structural transitions and in each catalytic reaction.

252 Deletion of ECM2 improved Cu<sup>2+</sup> tolerance of yeast containing the A3U or G5A 5'  
253 SS reporters (**Fig. 4B**). However, analysis of 1<sup>st</sup>- and 2<sup>nd</sup>-step splicing products showed  
254 similar splicing efficiencies in the presence or absence of Ecm2 (**Supplemental Fig.**  
255 **S1**). We did not study how decay of unspliced RNAs or splicing intermediates  
256 influenced these primer extension results (Liu et al. 2007). Therefore, it is difficult to  
257 conclude from the primer extension assay if *ecm2Δ* truly changed the splicing  
258 efficiencies for the A3U and G5A substrates.

259 Nonetheless, the increase in Cu<sup>2+</sup> tolerance observed with the G5A mutant in  
260 *ecm2Δ* yeast was noteworthy since this substitution can result in use of a cryptic,  
261 upstream 5' SS (Parker and Guthrie 1985; Lesser and Guthrie 1993a; Kandels-Lewis  
262 and Séraphin 1993). We used a modified ACT1-CUP1 reporter with competing 5' SS to

263 test whether or not Ecm2 changes cryptic SS usage (**Fig. 4C, Supplemental Fig. S2**).  
264 When Ecm2 was present in the yeast, we detected usage of both the cryptic (21±1% of  
265 spliced products) and normal 5' SS. However, in the absence of Ecm2 use of the cryptic  
266 5' SS was greatly reduced (7±4% of spliced products, **Fig. 4D**). This represents at least  
267 a 3-fold decrease based on our lower limit of detection. Combined, our results  
268 demonstrate that Ecm2 impacts the spliceosome active site to alter splicing of pre-  
269 mRNAs with non-consensus SS and permit the usage of an alternate, cryptic 5' SS.

### 270 **Genetic Interactions Between Ecm2 and the U6 snRNA 1<sup>st</sup>- and 2<sup>nd</sup>-Step Alleles**

271 Like *ecm2Δ*, a number of alleles of the U6 snRNA and Prp8 suppress Prp16  
272 ATPase mutations, have limited impact on splicing of ACT1-CUP1 reporters harboring  
273 consensus SS, and can promote or block splicing of reporters with particular SS  
274 substitutions (Eysmont et al. 2019; Liu et al. 2007; Query and Konarska 2004; Mayerle  
275 et al. 2017; McPheeters 1996). Many of these mutants have been categorized as 1<sup>st</sup>- or  
276 2<sup>nd</sup>-step alleles since, in addition to causing *ts* or *cs* phenotypes, they promote one of  
277 the catalytic steps of splicing over the other (**Fig. 5A**). Since *ecm2Δ* and 1<sup>st</sup>- and 2<sup>nd</sup>-  
278 step alleles share common features, we tested for genetic interactions between these  
279 alleles and *ecm2Δ*. We first examined interactions with the U6 snRNA U57C and U57A  
280 mutations which promote the 1<sup>st</sup> and 2<sup>nd</sup> steps, respectively (McPheeters 1996; Liu et al.  
281 2007).

282 The U6-U57A mutation had no effect on yeast growth at 16, 23, or 30°C in the  
283 absence of Ecm2 or in the presence of Ecm2<sup>WT</sup> or Ecm2<sup>1-143</sup> (which contains only the  
284 U6-binding domain, **Fig. 5B** and data not shown). The U6-U57C mutation also had no  
285 impact on growth at 16 or 23°C but was slower growing at 30°C. U6-U57C yeast

286 containing only the empty URA3 plasmid displayed a slower-growing phenotype  
287 compared to those containing plasmids for Ecm2<sup>WT</sup> or Ecm2<sup>1-143</sup>.

288 Strains deleted of both Ecm2 and U6 (*ecm2Δ snr6Δ*) failed to grow at 37°C even  
289 when they contained plasmids encoding for WT U6 and Ecm2 (data not shown).  
290 However, we were able to assay growth at 34°C. When yeast contained the 1<sup>st</sup>-step,  
291 U6-U57C allele, we observed a strong synthetic sick interaction with *ecm2Δ* that was  
292 partially rescued by expression of Ecm2<sup>WT</sup> or Ecm2<sup>1-143</sup>, with the former producing  
293 stronger rescue than the latter. In contrast, we observed only a weak synthetic genetic  
294 interaction between *ecm2Δ* and the 2<sup>nd</sup>-step allele, U6-U57A (**Fig. 5B**).

295 The interactions of *ecm2Δ* with these U6 mutants are most similar to those of 1<sup>st</sup>-  
296 step alleles in other splicing factors like Prp8 (Liu et al. 2007). When U6 mutations are  
297 present, loss of Ecm2 promotes the 1<sup>st</sup> step of splicing and presence of Ecm2 promotes  
298 the 2<sup>nd</sup> step. These results differ from those obtained upon deletion of the non-essential  
299 factor Isy1 (**Fig. 1C**): *isy1Δ* is synthetic lethal with U57A and suppresses the *ts*  
300 phenotype of U57C (Villa and Guthrie 2005). Thus, Isy1 appears to act as a 1<sup>st</sup>-step  
301 splicing factor when U6 is mutated, consistent with Isy1 release prior to the 2<sup>nd</sup> step  
302 (Plaschka et al. 2019), while Ecm2 can act as a 2<sup>nd</sup>-step factor and is consistent with its  
303 presence throughout both catalytic stages of splicing (**Fig. 1A**).

#### 304 **Genetic Interactions Between Ecm2 and Prp8 1<sup>st</sup>- and 2<sup>nd</sup>-Step Alleles**

305 Genetic interactions between *ecm2Δ* and Prp2, Prp16, and U2 stem II and Ecm2-  
306 control of 5' SS usage support a role for Ecm2 in the 1<sup>st</sup> step of splicing. However,  
307 genetic interactions with U6-U57 mutants and results using the A3C splicing reporter  
308 support an additional role for Ecm2 in the 2<sup>nd</sup> step. We next tested if *ecm2Δ* would show

309 genetic interactions with 1<sup>st</sup>- or 2<sup>nd</sup>-step alleles of Prp8 or both. We individually  
310 combined *ecm2Δ* with two 1<sup>st</sup>-step alleles of Prp8 (Prp8<sup>R1753K</sup> or Prp8<sup>E1960K</sup>) or two 2<sup>nd</sup>-  
311 step alleles (Prp8<sup>P986T</sup> or Prp8<sup>V1870N</sup>). For the 1<sup>st</sup>-step alleles, deletion of Ecm2 weakly  
312 suppressed the *cs* phenotype of Prp8<sup>R1753K</sup> and strongly suppressed the *cs* phenotype  
313 of Prp8<sup>E1960K</sup> (**Fig. 5C**). Neither Prp8 1<sup>st</sup>-step allele was able to completely correct the *ts*  
314 phenotype of *ecm2Δ*; although, slightly improved growth was observed at 37°C for yeast  
315 containing Prp8<sup>E1960K</sup> (**Fig. 5C**).

316 When *ecm2Δ* was combined with the 2<sup>nd</sup>-step alleles, we observed slightly  
317 improved growth at 37°C for yeast containing Prp8<sup>P986T</sup>. A stronger genetic interaction  
318 was observed with the Prp8<sup>V1870N</sup>. This 2<sup>nd</sup>-step allele exacerbated the *ts* phenotype of  
319 *ecm2Δ*, causing a strong growth defect at 30°C and no growth at 37°C (**Fig. 5C**). The  
320 growth defect of Prp8<sup>V1870N</sup> was partially corrected at 30°C by combining 1<sup>st</sup> and 2<sup>nd</sup>  
321 Prp8 alleles (Prp8<sup>V1870N,E1960K</sup>). However, this also resulted in stronger growth defects at  
322 other temperatures.

323 The *cs* suppression we observe of the Prp8<sup>E1960K</sup> 1<sup>st</sup>-step allele and *ts*  
324 exacerbation of the Prp8<sup>V1870N</sup> 2<sup>nd</sup>-step allele are consistent with *ecm2Δ* acting as a 2<sup>nd</sup>-  
325 step allele and facilitating exit of the spliceosome from the 1<sup>st</sup>-step catalytic  
326 conformation. Both the Prp8<sup>E1960K</sup> and Prp8<sup>V1870N</sup> substitutions are located within Prp8's  
327 RNaseH domain. Like U2 stem II, the RNaseH domain is both highly dynamic and  
328 toggles between alternate structures (Mayerle et al. 2017; Schellenberg et al. 2013).  
329 Ecm2 may impact Prp8-RNaseH dynamics or vice versa to support the 1<sup>st</sup>-step reaction.  
330 This is in juxtaposition to the results obtained with the U6 mutants, which were  
331 consistent with Ecm2 having a role in the 2<sup>nd</sup> step.

## 332 **DISCUSSION**

333           Using genetic and biochemical assays of splicing in cells, we have shown that  
334 yeast Ecm2 impacts multiple steps during the catalytic phase of splicing and that loss of  
335 Ecm2 perturbs how the spliceosome processes pre-mRNAs containing non-consensus  
336 SS. Deletion of *ECM2* results in genetic interactions with several structural switches in  
337 the spliceosome including U2 stem II, the RNaseH domain of Prp8, and the ATPases  
338 that control entry to and exit from the 1<sup>st</sup> step (Prp2 and Prp16, respectively). In sum,  
339 our data show that Ecm2 plays significant roles in spliceosome catalysis in addition to a  
340 function during activation (Xu and Friesen 2001).

### 341 **Ecm2 Modulates the Catalytic Steps of Splicing**

342           Our results support functions for Ecm2 during both catalytic steps in splicing.  
343 The differing genetic interactions we observe between *ecm2Δ* and U6 or Prp8 mutants  
344 suggest a more complicated mechanism from that of other alleles that exhibit more  
345 consistent genetic interactions (for example, a 2<sup>nd</sup>-step allele of *cef1* suppresses  
346 phenotypes of both 1<sup>st</sup>-step *prp8* and U6 alleles) (Query and Konarska 2012). Our  
347 results could be explained by distinct and genetically separable functions for Ecm2  
348 during the 1<sup>st</sup> and 2<sup>nd</sup> catalytic steps with Prp8 mutations revealing a role in the former  
349 and U6 mutations revealing a role in the latter. Since Ecm2 has only been observed to  
350 make contact with U2 stem IIb in 1<sup>st</sup>-step cryo-EM structures, it is possible that this  
351 interaction contributes to Ecm2's distinct functions during each catalytic step.

352           Several of our observations with Ecm2 are similar to those previously reported  
353 for Cwc2 and Isy1 (Hogg et al. 2014; Villa and Guthrie 2005; Rasche et al. 2012). Cwc2,  
354 Ecm2, and Isy1 form a highly interconnected network of interactions with one another,



355 the U6 snRNA, the intron, and a number of other splicing factors (**Figs. 1C, 6A**) (Galej  
356 et al. 2016; Wan et al. 2016). All three proteins can suppress Prp16 mutations and have  
357 synthetic lethal interactions with active site U2/U6 helix Ia or Ib mutations (Hogg et al.  
358 2014; Villa and Guthrie 2005; Xu et al. 1998). Neither Cwc2, Isy1, nor Ecm2 is essential  
359 for yeast growth, and cells remain viable even when Cwc2 and Ecm2 are both absent  
360 albeit with a significant *ts* growth defect (Hogg et al. 2014; Villa and Guthrie 2005; Xu  
361 and Friesen 2001). In addition, loss of Ecm2, loss of Isy1, or mutation of Cwc2 results in  
362 specific splicing defects in reporter pre-mRNAs with non-consensus SS (**Fig. 4B**) (Hogg  
363 et al. 2014; Villa and Guthrie 2005). This implies that spliceosomes missing one of  
364 these factors possess different substrate preferences and fidelity phenotypes. This is  
365 intriguing since *ecm2Δ* only results in a growth defect at high temperatures and splicing  
366 of pre-mRNAs containing consensus SS remains efficient (**Fig. 4B**). Thus, it is possible  
367 that yeast could bias the splicing of particular pre-mRNAs with non-consensus SS by  
368 regulating the Cwc2, Ecm2, and/or Isy1 content of spliceosomes without significantly  
369 compromising cellular splicing efficiency. This possibility has previously been proposed  
370 by Villa and Guthrie, who noted that deletion of Isy1 results in reduced fidelity of 3' SS  
371 selection (Villa and Guthrie 2005).

372 While there is some overlap in how Isy1 or Ecm2 loss or Cwc2 mutation impact  
373 splicing of non-consensus SS, the proteins also exert unique influences of the  
374 spliceosome. For example, *isy1Δ* and the Cwc2<sup>F183D</sup> mutant improve splicing of reporter  
375 pre-mRNAs containing a A302U 3' SS, but *ecm2Δ* only minimally changes A302U  
376 splicing (**Fig. 4B**). In addition, *ecm2Δ* changes Cu<sup>2+</sup> tolerance with the G5A reporter but  
377 this is unaffected by *isy1Δ* or Cwc2<sup>F183D</sup> (Villa and Guthrie 2005; Hogg et al. 2014).

378 Cellular splicing could thus be optimized for specific SS by independently controlling  
379 Cwc2, Ecm2, and Isy1 stoichiometry with spliceosomes.

380 These factors might also impact mRNA isoform production since Ecm2  
381 additionally permits usage of an alternative 5' SS (**Fig. 4D**). Interestingly, the non-  
382 essential yeast splicing factor Bud31 is required for use of an alternative 5' SS in the  
383 SRC1 mRNA (Saha et al. 2012), and Bud31 directly contacts the U6 snRNA, Ecm2, and  
384 Cwc2 in the yeast spliceosome (Plaschka et al. 2019). Bud31 and Ecm2 could permit  
385 promiscuous 5' SS use by similar mechanisms, although this has not yet been studied.  
386 In summary, spliceosomes may be fine-tuned by the presence or absence of non-  
387 essential splicing factors like Ecm2, and currently little is known about how the  
388 compositions of spliceosomes vary inside cells.

### 389 **Consequences of a Dynamic Ecm2/U2 Stem II Interaction During Splicing**

390 The spliceosome contains a number of proposed switches in which components  
391 toggle between one conformation or another at different stages of the reaction (Abelson  
392 2017). The U2 snRNA contains several of these switches including a U2 stem IIa-to-IIc  
393 conformational change during activation (van der Feltz and Hoskins 2019). In addition,  
394 it has also been proposed that stem IIc switches transiently back to stem IIa between  
395 the catalytic steps of splicing before re-forming IIc during the 2<sup>nd</sup> step (Perriman and  
396 Ares 2007; Hilliker et al. 2007). This mechanism was based in part on the observation  
397 that stem II substitutions that destabilize stem IIc (or stabilize stem IIa) can suppress *cs*  
398 alleles of Prp16. Our observations that *ecm2Δ* also suppresses Prp16 *cs* alleles (**Fig. 2**)  
399 and Ecm2 contacts U2 stem IIb in C complex may provide an alternate explanation.

400 We propose that Prp16 indirectly disrupts the Ecm2/stem II interaction during  
401 remodeling of the spliceosome between the 1<sup>st</sup> and 2<sup>nd</sup> steps. Eliminating or weakening  
402 this interaction by stem II mutation can suppress Prp16 cs alleles by destabilizing the  
403 1<sup>st</sup>-step conformation. This explanation is supported by cryo-EM structural data in which  
404 a transient contact between U2 stem IIb/c and the C-terminal RRM of Ecm2 is observed  
405 in 1<sup>st</sup>-step complexes (B\* and C complexes) but not those preceding or following (B<sup>act</sup>  
406 and C\* complexes) (Rauhut et al. 2016; Galej et al. 2016; Fica et al. 2017; Yan et al.  
407 2016a; Wan et al. 2016, 2019). While additional structural information is needed for the  
408 on-pathway intermediates during 2<sup>nd</sup>-step active site assembly, stem IIa has not yet  
409 been observed in C\* spliceosomes and accommodation of stem IIa in these complexes  
410 may be incompatible with binding of splicing factors (Prp17) and U2 snRNP interactions  
411 with Syf1 (Fica et al. 2019; Wan et al. 2018; Liu et al. 2017; Fica et al. 2017; Yan et al.  
412 2016b). In light of these observations, stem IIc could remain intact throughout catalysis,  
413 and IIc-to-IIa toggling occurs later during spliceosome disassembly or U2 snRNP  
414 reassembly (Rodgers et al. 2015; Yan et al. 1998). Regardless, further work is needed  
415 to characterize the short-lived intermediates that form during the 1<sup>st</sup>- to 2<sup>nd</sup>-step  
416 transition.

417 The viability of *ecm2Δ* and stem IIbΔ strains (**Fig. 3B**) (Xu and Friesen 2001;  
418 Ares and Igel 1990) show that the Ecm2/stem II interaction is not essential for yeast  
419 splicing. It is notable, however, that *ecm2Δ* exhibits synthetic lethal interactions with  
420 multiple stem II mutations. This includes, to our knowledge, the first genetic data  
421 showing synthetic lethality with the U2-2,4 mutant, which stabilizes stem IIa. This  
422 supports the notion that stem IIa must be disrupted during splicing and complements

423 ample evidence for the importance of stem IIc formation (Perriman and Ares 2007;  
424 Hilliker et al. 2007). It is possible that the Ecm2/stem II interaction only becomes limiting  
425 for splicing when stem IIa/c toggling is disturbed or when the active site is destabilized  
426 by SS mutations.

### 427 **Implications for Human RBM22 and Wrapped Intron Formation**

428 The evolutionary histories of Cwc2, Ecm2, and RBM22 have not been studied,  
429 and it is uncertain how RBM22 may have evolved to functionally replace both proteins.  
430 Based on sequence alignments and crosslinking studies, it has been proposed that  
431 Cwc2 and RBM22 share a common function in binding U6 and interacting with the  
432 spliceosome's catalytic elements (Rasche et al. 2012). However, when fragments of the  
433 yeast and human C complex spliceosomes are aligned, RBM22 most closely mimics the  
434 interactions of Ecm2 with the U6 snRNA (**Supplemental Movie S1**). In terms of U6  
435 interaction, we believe that RBM22 and Ecm2, not Cwc2, are closer structural  
436 homologs.

437 Both RBM22 and Cwc2 bind the intronic RNA just downstream of the 5' SS. The  
438 RBM22/intron interaction contains an unusual and distinctive structure not observed  
439 with Cwc2. In human C and P complex spliceosomes, RBM22 completely encircles the  
440 intron (**Figure 6B**) (Fica et al. 2019; Zhan et al. 2018). It is unlikely that this wrapped  
441 intron structure would form by threading of the intron through RBM22. Insights from  
442 Ecm2 provide a plausible mechanism for its formation. The C-terminal RRM of RBM22  
443 could transiently interact with U2 stem IIb/c—analogous to the interaction between  
444 Ecm2 and stem II in yeast (**Figure 6C**). This could open RBM22 for intron binding and

445 enable subsequent wrapping of the intron after disruption of the RRM/stem II  
446 interaction.

447 Analyses of cryo-EM structures reveal that movement of RBM22 towards U2  
448 stem II is not occluded by presence of other splicing factors and stem IIb is within an  
449 accessible distance for the RRM, assuming structural flexibility of the linker between the  
450 ZNF and RRM domains. There is some biochemical evidence for a RBM22/U2 snRNA  
451 interaction: anti-RBM22 antibodies can immunoprecipitate (IP) small amounts of the U2  
452 snRNA from C complex spliceosomes after proteinase K treatment and without co-IP of  
453 the U5 or U6 snRNAs—consistent with a direct interaction (Rasche et al. 2012). If a  
454 transient RBM22/U2 interaction is necessary for intron wrapping, U2 snRNA stem II  
455 may thus act as a chaperone for formation of this protein/RNA complex.

## 456 **MATERIALS AND METHODS**

457 Yeast strains and plasmids used in these studies are described in **Supplemental**  
458 **Tables S1** and **S2**. Yeast transformation and growth were carried out using standard  
459 techniques and media.

### 460 **Genetic Deletions of ECM2**

461 Deletion of the ECM2 gene was carried out by replacement of the gene with an  
462 antibiotic resistance cassette (hygromycin or nourseothricin) by homologous  
463 recombination in the appropriate parental strain (**Supplemental Table S1**, (Goldstein  
464 and McCusker 1999)).

### 465 **Cloning of ECM2 and Site-Directed Mutagenesis**

466 ECM2 along with 300 base pairs of up- and downstream DNA was amplified from  
467 yeast genomic DNA by PCR. The resulting product was digested with NotI and Sall

468 restriction enzymes and then ligated into pRS416 (URA3 CEN6) at those same  
469 restriction sites to create plasmid pAAH1056 containing the WT ECM2 gene. Novel  
470 mutants of Ecm2 were generated using inverse polymerase chain reaction (PCR) with  
471 Phusion DNA polymerase (New England Biolabs; Ipswich, MA). All plasmids were  
472 confirmed by sequencing.

### 473 ***ACT1-CUP1* Copper Tolerance Assays**

474 Yeast strains expressing *ACT1-CUP1* reporters were grown to mid-log phase in -  
475 leu -trp dropout media to maintain selection for the plasmids, adjusted to  $OD_{600} = 0.5$   
476 and equal volumes were spotted onto plates containing 0-2.5 mM  $CuSO_4$  (Lesser and  
477 Guthrie 1993b; Carrocci et al. 2018). Plates were scored and imaged after 3 days  
478 growth at 30°C.

### 479 **Temperature Growth Assays**

480 Yeast strains were grown to mid-log phase at permissive temperatures in YPD or  
481 -ura dropout liquid media. Cell growth was then quantified by measuring  $OD_{600}$ . Equal  
482 volumes of cells were diluted to an  $OD_{600} = 0.5$  were stamped onto YPD-agar plates and  
483 incubated at 23°C, 30°C or 37°C for three days or at 16°C for ten days before imaging.

### 484 **Primer Extension**

485 Cells were grown at 30°C in 25 mL yeast -leu -trp dropout liquid media until  
486  $OD_{600}$  reached 0.5–0.8, and 10  $OD_{600}$  units were collected by centrifugation. Total yeast  
487 RNA was isolated following the MasterPure™ Yeast RNA Purification Kit (Epicenter,  
488 Madison, WI) protocol with minor changes as previously described (Carrocci et al.  
489 2017). Primer extension was performed with IR dye conjugated probes yAC6:  
490 /5IRD700/GGCACTCATGACCTTC and yU6: /5IRD700/GAACTGCTGATCATCTCTG.

491 purchased from Integrated DNA Technologies (Skokie, IL USA) (Carrocci et al. 2017;  
492 Kaur et al. 2020). Gels were imaged with the Amersham IR Typhoon 5 (GE Healthcare)  
493 excitation at 685 nm, emission filter 720BP20, PMT voltage of 700V, and 100  $\mu$ m pixel  
494 size. Band intensities were quantified with ImageQuant TL v8.1 (GE Healthcare).

#### 495 **Structural Alignments and Figure Creation**

496 Structural alignments of portions of human and yeast spliceosome complexes  
497 were carried out using PyMol by aligning to the U6 snRNA. Aligned structures of yeast  
498 spliceosomes were obtained from PyMOL4Spliceosome  
499 (<https://github.com/mmagnus/PyMOL4Spliceosome>) (Magnus et al. 2019). Figures and  
500 movies containing molecular structures were generated using Pymol (Schrödinger).

#### 501 **SUPPLEMENTAL MATERIAL**

502 Supplemental material is available for this article.

#### 503 **ACKNOWLEDGEMENTS**

504 We thank Maggie Rodgers and Brexton Turner for carrying out initial experiments  
505 on Ecm2. We thank Manny Ares (UC Santa Cruz), Charles Query (Albert Einstein  
506 College of Medicine), David Brow (U. Wisconsin-Madison), Christine Guthrie (UCSF),  
507 and Magda Konarska (U. Warsaw) for providing strains and plasmids used in these  
508 studies. We thank Eric Montemayor (UW-Madison) for help in creating Figure 6. We  
509 thank Tucker Carrocci (Yale U.), Sarah Hansen (U. Utah), Karli Lipinski (UW-Madison),  
510 and Maggie Rodgers (Johns Hopkins U.) for critical reading of the manuscript.

#### 511 **FUNDING**

512 This work was supported by the National Institutes of Health (R01 GM112735  
513 and R35 GM136261 to AAH); a Shaw Scientist Award (AAH); and Hilldale  
514 Undergraduate Research Scholarships (BN and CS).

515

## 516 **FIGURE LEGENDS**

517 **Figure 1.** Structural Analysis of Ecm2 during Splicing. **(A)** Schematic of the pre-mRNA  
518 splicing pathway. ATPases tested for genetic interactions with Ecm2 are shown above  
519 the arrows of the respective steps that they promote. Spliceosome complexes  
520 containing Ecm2 are underlined in blue. **(B)** Cryo-EM structure and domain organization  
521 of Ecm2. U6 and U2 snRNA interacting regions are colored in red and green,  
522 respectively. Locations of truncation mutants studied in panel (C) are indicated.  
523 Structure from 6EXN.pdb. **(C)** Structure of the Cwc2/Ecm2/Isy1 hub and Ecm2-RRM/U2  
524 stem II interaction in C complex. The position of stem IIb after remodeling in C\* complex  
525 has been superimposed on this structure. The U6 snRNA, Cwc2 and Ecm2 do not  
526 significantly change positions in C\* complex. This figure was created using 5LJ5.pdb  
527 and 5MQ0.pdb. **(D)** Temperature sensitivity of *ecm2Δ* and truncation mutants on -ura  
528 dropout media after 3 days of growth.

529

530 **Figure 2.** Genetic Interactions between Ecm2 and Spliceosomal ATPases. **(A-C)**  
531 Mutations in Prp2 (A, *cs*), Prp16 (B, *cs*), and Prp22 (C, *cs* and *ts*) were combined with  
532 *ecm2Δ* and tested for suppression or exacerbation of temperature-dependent growth  
533 phenotypes. Yeast were plated on YPD media and imaged after 3 (23, 30, or 37°C) or  
534 10 (16°C) days of growth.



535

536 **Figure 3.** Genetic Interactions between Ecm2 and U2 stem II Mutations. **(A)** Schematic  
537 of stem IIa/IIc toggling. Mutations which disfavor stem IIc (U2-2,4 and  $\Delta$ CC'. green-  
538 colored labels) are shown in the stem IIa structure. Mutations which disfavor stem IIa  
539 (G53A, IIc+; red-colored labels) are shown in the stem IIc structure. Nucleotides that are  
540 deleted in the  $\Delta$ IIb mutant are colored in purple. **(B)** Mutations in stem II were combined  
541 with *ecm2 $\Delta$*  and tested for suppression or exacerbation of temperature-dependent  
542 growth phenotypes. Yeast were plated on YPD media and imaged after 3 (23, 30, or  
543 37°C) or 10 (16°C) days of growth.

544

545 **Figure 4.** Impact of Ecm2 on Splicing of ACT1-CUP1 Reporter pre-mRNAs. **(A)**  
546 Schematic of the ACT1-CUP1 reporter pre-mRNA with non-consensus substitutions  
547 noted. **(B)** ACT1-CUP1 assay results. Representative images of yeast growth after 3  
548 days at 30°C on agar plates made with -leu -trp dropout media containing 0 or 0.7 mM  
549 Cu<sup>2+</sup> are shown above the bar graph. Each value in the graph represents the average of  
550 the highest concentration of Cu<sup>2+</sup> at which growth was observed in at least three  
551 replicate assays. Error bars represent the standard deviation. **(C)** Schematic of the  
552 modified ACT1-CUP1 reporter containing a competing, cryptic 5' SS. **(D)** Primer  
553 extension assay of cryptic 5' SS usage using the reporter shown in panel (C). Primer  
554 extension of the U6 snRNA was included as a control. The percentages of cryptic  
555 products (ratios of cryptic products/total products) are shown below the gel and are the  
556 averages of three replicate experiments  $\pm$  the standard deviation.

557

558 **Figure 5.** Genetic Interactions between Ecm2 and U6 or Prp8 1<sup>st</sup>- and 2<sup>nd</sup>-Step Alleles.  
559 (A) Illustration of how alleles of Prp8, Prp16, and U6 function to promote the 1<sup>st</sup> or 2<sup>nd</sup>  
560 step of splicing. (B) A 1<sup>st</sup>- or 2<sup>nd</sup>-step allele of U6 (red and green, respectively) was  
561 combined with URA3 plasmids either lacking or coding for Ecm2 variants in *ecm2Δ*  
562 yeast. The strains were then tested for suppression or exacerbation of temperature-  
563 dependent growth phenotypes. Yeast were plated on -URA dropout media and imaged  
564 after 2 days of growth. (C) 1<sup>st</sup>- and 2<sup>nd</sup>-step alleles of Prp8 (red and green, respectively)  
565 were combined with *ecm2Δ* and tested for suppression or exacerbation of temperature-  
566 dependent growth phenotypes. Yeast were plated on YPD media and imaged after 3  
567 (23, 30, or 37°C) or 10 (16°C) days of growth.

568  
569 **Figure 6.** The Cwc2/Ecm2/Isy1 Interaction Network and Structure of Human RBM22.  
570 (A) A large number of splicing factors interact with Cwc2, Ecm2, and/or Isy1 suggesting  
571 that these proteins form a network hub for modulating spliceosome activity. In this  
572 model, regulatory signals could flow into the hub from the NTC and NTC-related  
573 proteins and outwards to the spliceosome active site consisting of the intron, Prp8, and  
574 U2/U6 snRNAs. (B) Two views of the cryo-EM structure of RBM22 from a human C  
575 complex spliceosome. Domains of RBM22 are noted and intronic RNA downstream of  
576 the 5' SS is shown in black spacefill. Note that RBM22 completely encircles the RNA.  
577 Structure from 6EXN.pdb. (C) Hypothetical model for formation of the structure shown in  
578 panel (B). The RRM domain of RBM22 could make transient contact with human U2  
579 stem IIb to allow for docking of the intron and subsequent wrapping. Structures in

580 panels (B) and (C) are from 5YZG.pdb. The hypothetical model in panel (C) was  
581 created using PyMol.

582

583 **REFERENCES**

584  
585

- 586 Abelson J. 2017. A close-up look at the spliceosome, at last. *Proceedings of the National*  
587 *Academy of Sciences of the United States of America* **114**: 4288–4293.
- 588 Ares M, Igel AH. 1990. Lethal and temperature-sensitive mutations and their suppressors  
589 identify an essential structural element in U2 small nuclear RNA. **4**: 2132–2145.
- 590 Carrocci TJ, Paulson JC, Hoskins AA. 2018. Functional analysis of Hsh155/SF3b1 interactions  
591 with the U2 snRNA/branch site duplex. *RNA (New York, NY)* **24**: 1028–1040.
- 592 Carrocci TJ, Zoerner DM, Paulson JC, Hoskins AA. 2017. SF3b1 mutations associated with  
593 myelodysplastic syndromes alter the fidelity of branchsite selection in yeast. *Nucleic Acids*  
594 *Res* **45**: 4837-4852.
- 595 Eysmont K, Matylla-Kulińska K, Jaskulska A, Magnus M, Konarska MM. 2019.  
596 Rearrangements within the U6 snRNA Core during the Transition between the Two Catalytic  
597 Steps of Splicing. *Molecular Cell* **75**: 538-548.
- 598 Feltz C van der, Hoskins AA. 2019. Structural and functional modularity of the U2 snRNP in  
599 pre-mRNA splicing. *Crit Rev Biochem Mol* **54**: 1–23.
- 600 Fica SM, Oubridge C, Galej WP, Wilkinson ME, Bai X, Newman AJ, Nagai K. 2017. Structure  
601 of a spliceosome remodelled for exon ligation. *Nature* **542**: 377–380.
- 602 Fica SM, Oubridge C, Wilkinson ME, Newman AJ, Nagai K. 2019. A human postcatalytic  
603 spliceosome structure reveals essential roles of metazoan factors for exon ligation. *Science*  
604 *(New York, NY)* **363**: 710-714.
- 605 Galej WP, Wilkinson ME, Fica SM, Oubridge C, Newman AJ, Nagai K. 2016. Cryo-EM  
606 structure of the spliceosome immediately after branching. *Nature* **537**: 197–201.
- 607 Goldstein A, McCusker J. 1999. Three new dominant drug resistance cassettes for gene  
608 disruption in *Saccharomyces cerevisiae*. *Yeast* **15**: 1541-53.
- 609 Hilliker AK, Mefford MA, Staley JP. 2007. U2 toggles iteratively between the stem IIa and stem  
610 IIc conformations to promote pre-mRNA splicing. *Genes Dev* **21**: 821–834.
- 611 Hogg R, Almeida RA de, Ruckshanthi JPD, O’Keefe RT. 2014. Remodeling of U2-U6 snRNA  
612 helix I during pre-mRNA splicing by Prp16 and the NineTeen Complex protein Cwc2.  
613 *Nucleic Acids Research* **42**: 8008–8023.

- 614 Hogg R, McGrail JC, O’Keefe RT. 2010. The function of the NineTeen Complex (NTC) in  
615 regulating spliceosome conformations and fidelity during pre-mRNA splicing. *Biochem Soc*  
616 *Trans* **38**: 1110-1115.
- 617 Kandels-Lewis S, Séraphin B. 1993. Involvement of U6 snRNA in 5’ splice site selection.  
618 *Science (New York, NY)* **262**: 2035–2039.
- 619 Kastner B, Will CL, Stark H, Lührmann R. 2019. Structural Insights into Nuclear pre-mRNA  
620 Splicing in Higher Eukaryotes. *Cold Spring Harbor Perspectives in Biology* a032417.
- 621 Kaur H, Groubert B, Paulson JC, McMillan S, Hoskins AA. 2020. Impact of cancer-associated  
622 mutations in Hsh155/SF3b1 HEAT repeats 9-12 on pre-mRNA splicing in *Saccharomyces*  
623 *cerevisiae*. *Plos One* **15**: e0229315.
- 624 Lardelli RM, Thompson JX, Yates JR, Stevens SW. 2010. Release of SF3 from the intron  
625 branchpoint activates the first step of pre-mRNA splicing. *RNA (New York, NY)* **16**: 516–528.
- 626 Lesser C, Guthrie C. 1993a. Mutations in U6 snRNA that alter splice site specificity:  
627 implications for the active site. *Science* **262**: 1982–1988.
- 628 Lesser CF, Guthrie C. 1993b. Mutational analysis of pre-mRNA splicing in *Saccharomyces*  
629 *cerevisiae* using a sensitive new reporter gene, CUP1. *Genetics* **133**: 851–863.
- 630 Liu L, Query CC, Konarska MM. 2007. Opposing classes of prp8 alleles modulate the transition  
631 between the catalytic steps of pre-mRNA splicing. *Nat Struct Mol Biol* **14**: 519–526.
- 632 Liu S, Li X, Zhang L, Jiang J, Hill RC, Cui Y, Hansen KC, Zhou ZH, Zhao R. 2017. Structure of  
633 the yeast spliceosomal postcatalytic P complex. *Science (New York, NY)* **358**: 1278–1283.
- 634 Magnus M, Antczak M, Zok T, Wiedemann J, Lukasiak P, Cao Y, Bujnicki JM, Westhof E,  
635 Szachniuk M, Miao Z. 2019. RNA-Puzzles toolkit: a computational resource of RNA 3D  
636 structure benchmark datasets, structure manipulation, and evaluation tools. *Nucleic Acids Res*  
637 **48**: 576–588.
- 638 Mayerle M, Guthrie C. 2017. Genetics and biochemistry remain essential in the structural era of  
639 the spliceosome. *Methods (San Diego, Calif)* **125**: 3–9.
- 640 Mayerle M, Raghavan M, Ledoux S, Price A, Stepankiw N, Hadjivassiliou H, Moehle EA,  
641 Mendoza SD, Pleiss JA, Guthrie C, et al. 2017. Structural toggle in the RNaseH domain of  
642 Prp8 helps balance splicing fidelity and catalytic efficiency. *Proceedings of the National*  
643 *Academy of Sciences of the United States of America* **114**: 4739–4744.
- 644 McGrail JC, Krause A, O’Keefe RT. 2009. The RNA binding protein Cwc2 interacts directly  
645 with the U6 snRNA to link the nineteen complex to the spliceosome during pre-mRNA  
646 splicing. *Nucleic Acids Research* **37**: 4205–4217.

- 647 McPheeters DS. 1996. Interactions of the yeast U6 RNA with the pre-mRNA branch site. *RNA*  
648 (*New York, NY*) **2**: 1110–1123.
- 649 Parker R, Guthrie C. 1985. A point mutation in the conserved hexanucleotide at a yeast 5' splice  
650 junction uncouples recognition, cleavage, and ligation. *Cell* **41**: 107–118.
- 651 Perriman R, Ares M. 2010. Invariant U2 snRNA nucleotides form a stem loop to recognize the  
652 intron early in splicing. *Molecular Cell* **38**: 416–427.
- 653 Perriman RJ, Ares M. 2007. Rearrangement of competing U2 RNA helices within the  
654 spliceosome promotes multiple steps in splicing. **21**: 811–820.
- 655 Plaschka C, Newman AJ, Nagai K. 2019. Structural Basis of Nuclear pre-mRNA Splicing:  
656 Lessons from Yeast. *Cold Spring Harbor Perspectives in Biology* a032391.
- 657 Query CC, Konarska MM. 2012. CEF1/CDC5 alleles modulate transitions between catalytic  
658 conformations of the spliceosome. *RNA (New York, NY)* **18**: 1001–1013.
- 659 Query CC, Konarska MM. 2004. Suppression of multiple substrate mutations by spliceosomal  
660 prp8 alleles suggests functional correlations with ribosomal ambiguity mutants. *Molecular*  
661 *Cell* **14**: 343–354.
- 662 Rasche N, Dybkov O, Schmitzová J, Akyildiz B, Fabrizio P, Lührmann R. 2012. Cwc2 and its  
663 human homologue RBM22 promote an active conformation of the spliceosome catalytic  
664 centre. *The EMBO Journal* **31**: 1591–1604.
- 665 Rauhut R, Fabrizio P, Dybkov O, Hartmuth K, Pena V, Chari A, Kumar V, Lee C-T, Urlaub H,  
666 Kastner B, et al. 2016. Molecular architecture of the *Saccharomyces cerevisiae* activated  
667 spliceosome. *Science (New York, NY)* **353**: 1399–1405.
- 668 Rodgers ML, Didychuk AL, Butcher SE, Brow DA, Hoskins AA. 2016. A multi-step model for  
669 facilitated unwinding of the yeast U4/U6 RNA duplex. *Nucleic Acids Research* **44**: 10912-  
670 10928.
- 671 Rodgers ML, Tretbar US, Dehaven A, Alwan AA, Luo G, Mast HM, Hoskins AA. 2016.  
672 Conformational dynamics of stem II of the U2 snRNA. *RNA (New York, NY)* **22**: 225-236.
- 673 Saha D, Banerjee S, Bashir S, Vijayraghavan U. 2012. Context dependent splicing functions of  
674 Bud31/Ycr063w define its role in budding and cell cycle progression. *Biochem Bioph Res Co*  
675 **424**: 579–585.
- 676 Schellenberg MJ, Wu T, Ritchie DB, Fica S, Staley JP, Atta KA, LaPointe P, MacMillan AM.  
677 2013. A conformational switch in PRP8 mediates metal ion coordination that promotes pre-  
678 mRNA exon ligation. *Nature Structural & Molecular Biology* **20**: 728–734.

- 679 Schwer B. 2008. A conformational rearrangement in the spliceosome sets the stage for Prp22-  
680 dependent mRNA release. *Molecular Cell* **30**: 743–754.
- 681 Schwer B, Guthrie C. 1992. A conformational rearrangement in the spliceosome is dependent on  
682 PRP16 and ATP hydrolysis. *The EMBO Journal* **11**: 5033–5039.
- 683 Semlow DR, Blanco MR, Walter NG, Staley JP. 2016. Spliceosomal DEAH-Box ATPases  
684 Remodel Pre-mRNA to Activate Alternative Splice Sites. *Cell* **164**: 985–998.
- 685 Villa T, Guthrie C. 2005. The Isy1p component of the NineTeen complex interacts with the  
686 ATPase Prp16p to regulate the fidelity of pre-mRNA splicing. *Genes Dev* **19**: 1894–1904.
- 687 Wagner JD, Jankowsky E, Company M, Pyle AM, Abelson JN. 1998. The DEAH-box protein  
688 PRP22 is an ATPase that mediates ATP-dependent mRNA release from the spliceosome and  
689 unwinds RNA duplexes. *The EMBO Journal* **17**: 2926–2937.
- 690 Wahl MC, Will CL, Lührmann R. 2009. The spliceosome: design principles of a dynamic RNP  
691 machine. *Cell* **136**: 701–718.
- 692 Wan R, Bai R, Yan C, Lei J, Shi Y. 2019. Structures of the Catalytically Activated Yeast  
693 Spliceosome Reveal the Mechanism of Branching. *Cell* **177**: 339-351.e13.
- 694 Wan R, Yan C, Bai R, Huang G, Shi Y. 2016. Structure of a yeast catalytic step I spliceosome at  
695 3.4 Å resolution. *Science (New York, NY)* **353**: 895–904.
- 696 Wan R, Yan C, Bai R, Lei J, Shi Y. 2017. Structure of the Post-catalytic Spliceosome from  
697 *Saccharomyces cerevisiae*. *Cell* **171**: 1589-1598.
- 698 Wassarman D, Steitz J. 1992. Interactions of small nuclear RNA's with precursor messenger  
699 RNA during in vitro splicing. *Science* **257**: 1918–1925.
- 700 Wlodaver AM, Staley JP. 2014. The DExD/H-box ATPase Prp2p destabilizes and proofreads the  
701 catalytic RNA core of the spliceosome. *RNA (New York, NY)* **20**: 282-94.
- 702 Xu D, Field DJ, Tang S-J, Moris A, Bobechko BP, Friesen JD. 1998. Synthetic Lethality of  
703 Yeast slt Mutations with U2 Small Nuclear RNA Mutations Suggests Functional Interactions  
704 between U2 and U5 snRNPs That Are Important for Both Steps of Pre-mRNA Splicing. *Mol*  
705 *Cell Biol* **18**: 2055–2066.
- 706 Xu D, Friesen JD. 2001. Splicing factor slt11p and its involvement in formation of U2/U6 helix  
707 II in activation of the yeast spliceosome. *Molecular and Cellular Biology* **21**: 1011–1023.
- 708 Yan C, Wan R, Bai R, Huang G, Shi Y. 2016a. Structure of a yeast activated spliceosome at 3.5  
709 Å resolution. *Science (New York, NY)* **353**: 904–911.

- 710 Yan C, Wan R, Bai R, Huang G, Shi Y. 2016b. Structure of a yeast step II catalytically activated  
711 spliceosome. *Science (New York, NY)* **355**: 149–155.
- 712 Yan C, Wan R, Shi Y. 2019. Molecular Mechanisms of pre-mRNA Splicing through Structural  
713 Biology of the Spliceosome. *Cold Spring Harbor Perspectives in Biology* **11**: a032409.
- 714 Yan D, Perriman R, Igel H, Howe KJ, Neville M, Ares M. 1998. CUS2, a yeast homolog of  
715 human Tat-SF1, rescues function of misfolded U2 through an unusual RNA recognition  
716 motif. *Molecular and Cellular Biology* **18**: 5000–5009.
- 717 Zhan X, Yan C, Zhang X, Lei J, Shi Y. 2018. Structure of a human catalytic step I spliceosome.  
718 *Science (New York, NY)* **359**: 537–545.

719

720



721 **Figures**

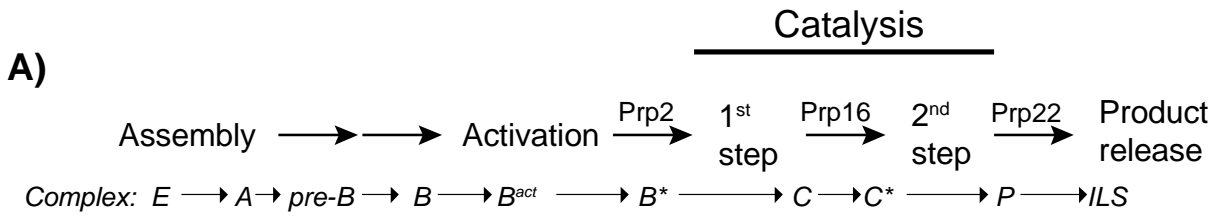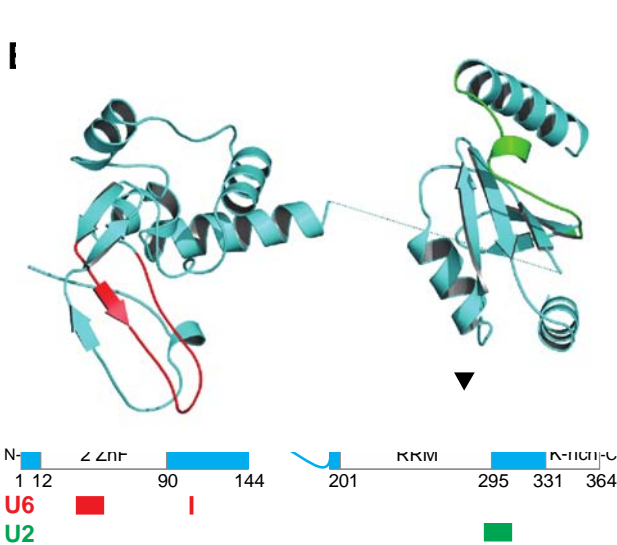

**D) Ecm2**

| Ecm2  | 30°C | 37°C |
|-------|------|------|
| □     |      |      |
| WT    |      |      |
| 1-144 |      |      |
| 1-198 |      |      |
| 1-266 |      |      |
| 1-326 |      |      |

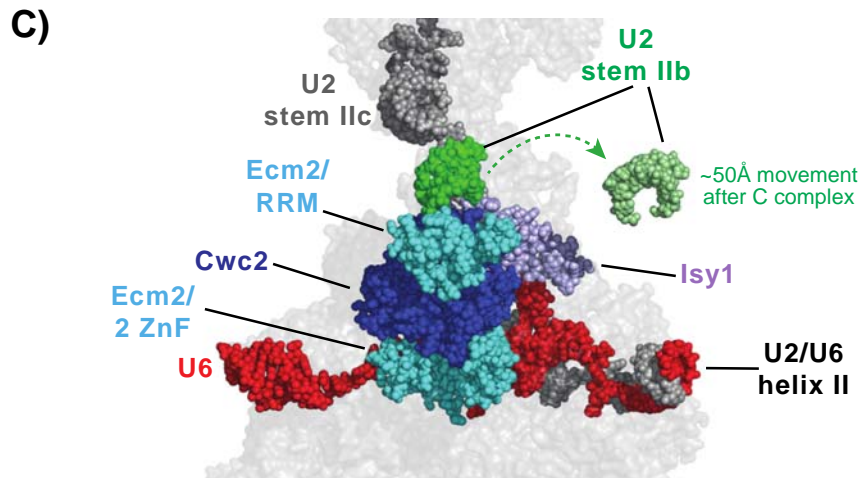

**Figure 1**

722  
 723  
 724

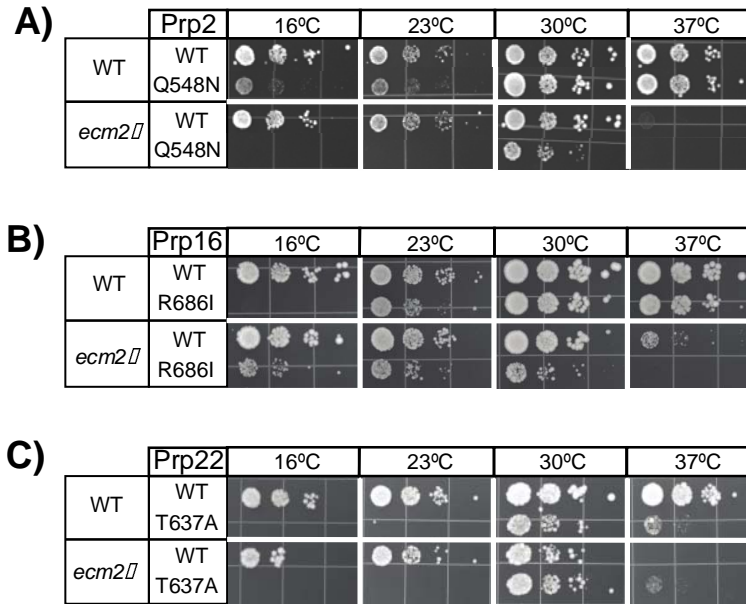

**Figure 2**

725  
726  
727  
728



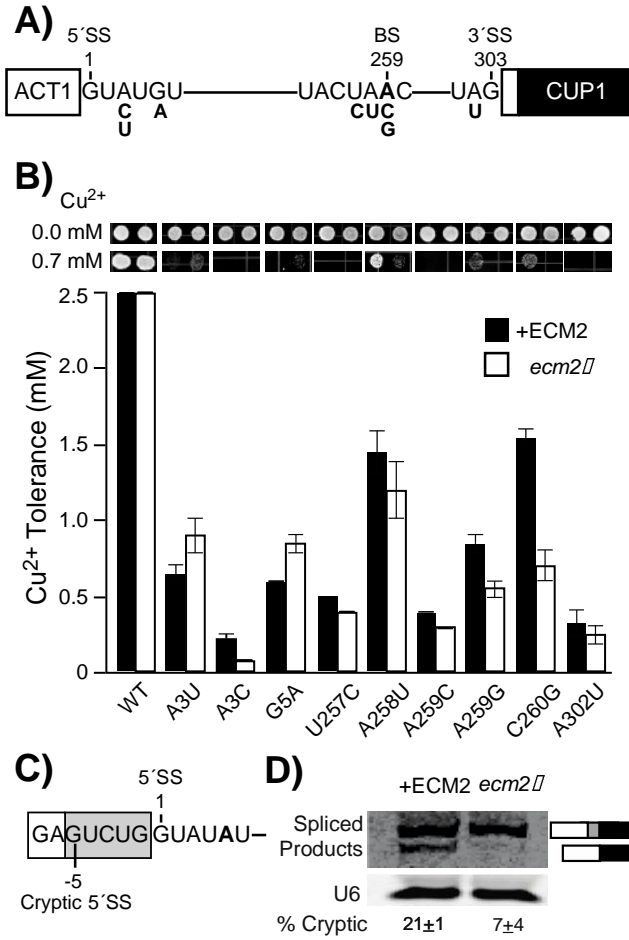

**Figure 4**

733  
 734  
 735  
 736

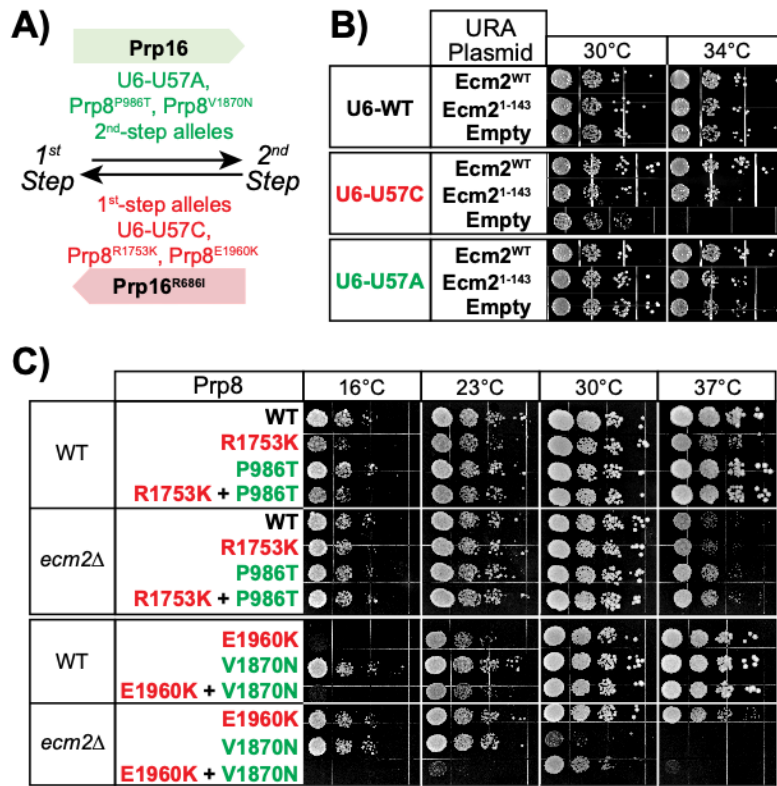

737  
738  
739  
740

Figure 5

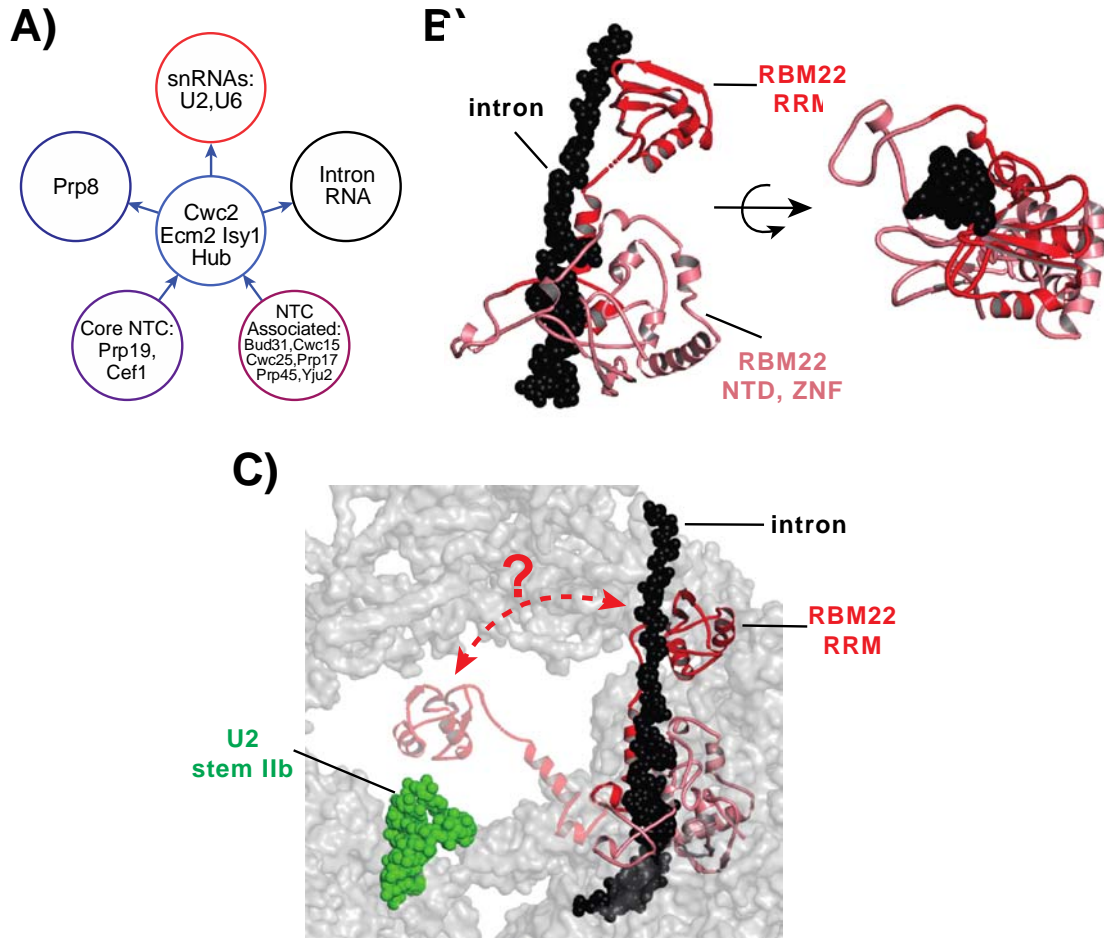

Figure 6

741  
742  
743  
744

745

# Catalysis

A)

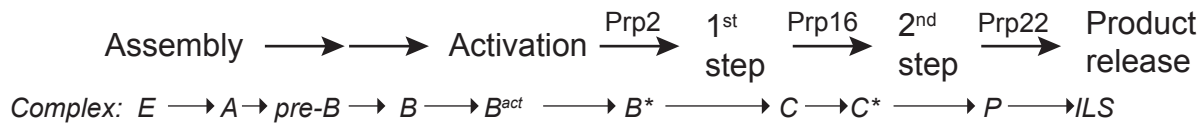

B)

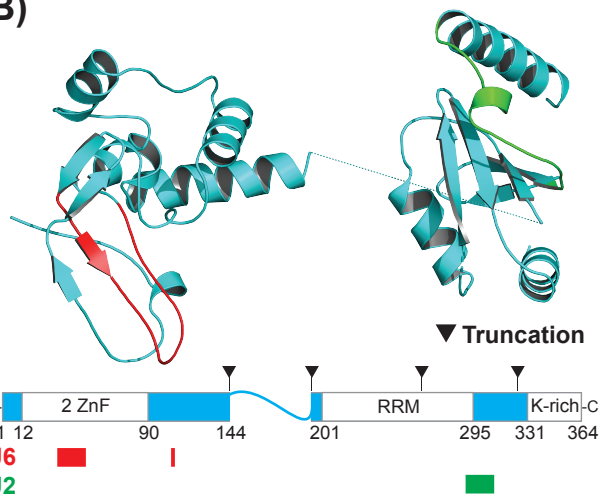

D)

## Ecm2

| Ecm2     | 30°C | 37°C |
|----------|------|------|
| $\Delta$ |      |      |
| WT       |      |      |
| 1-144    |      |      |
| 1-198    |      |      |
| 1-266    |      |      |
| 1-326    |      |      |

C)

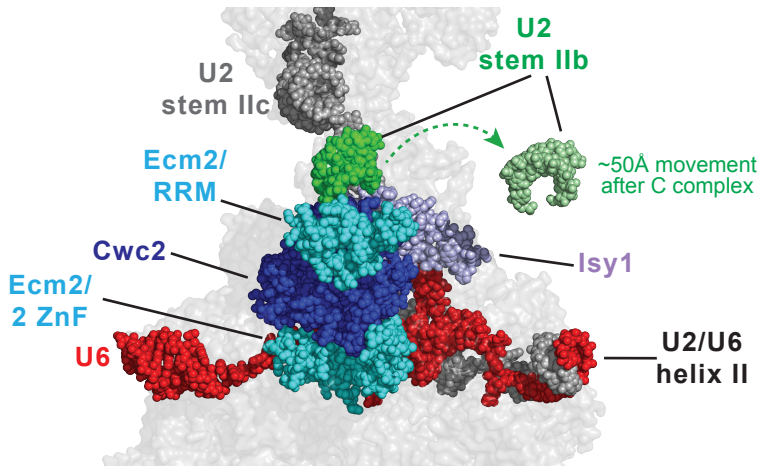



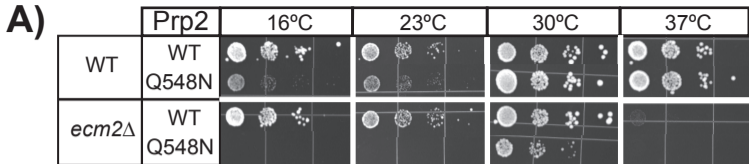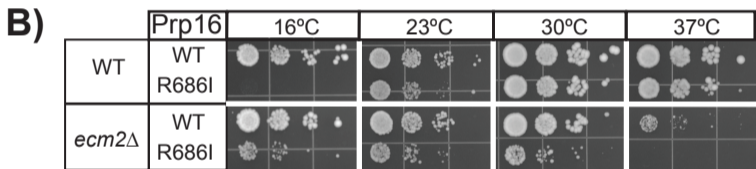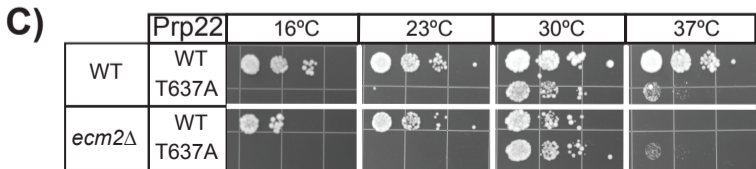



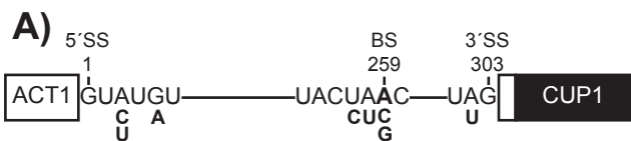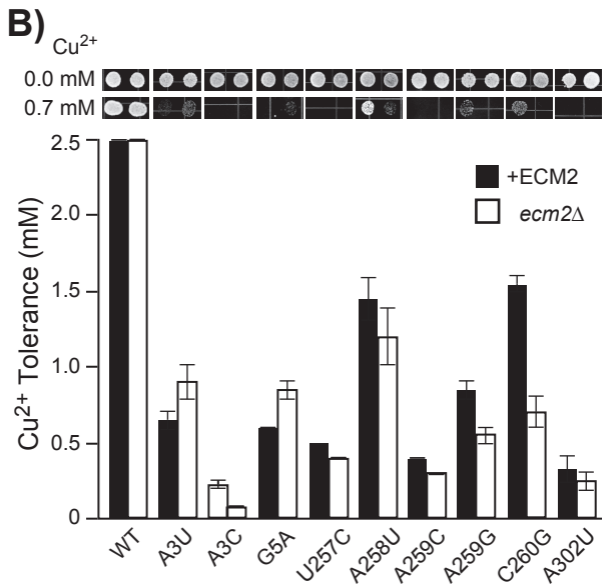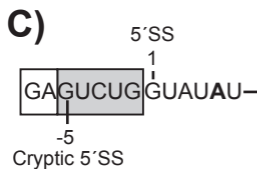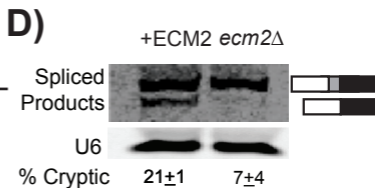

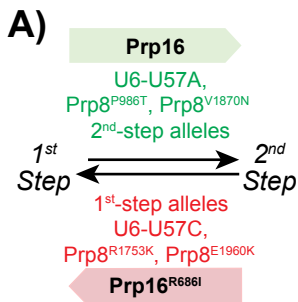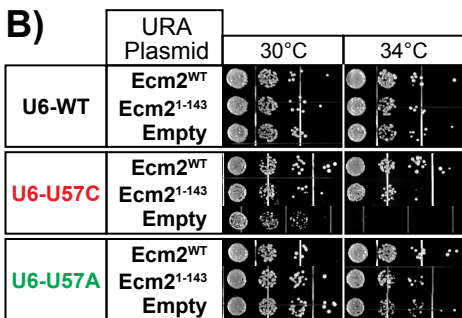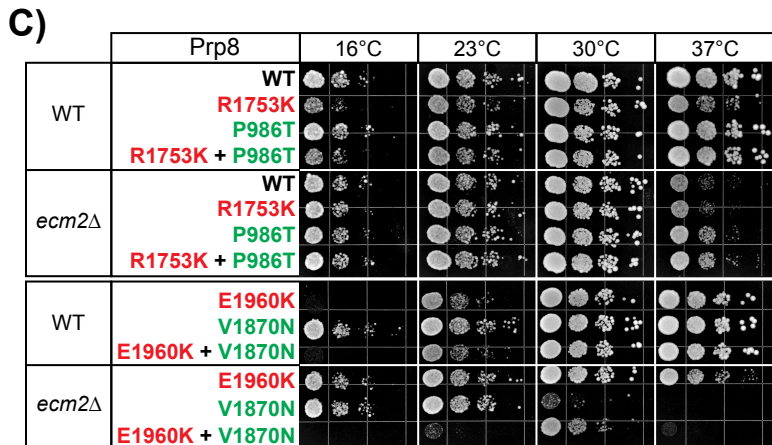

**A)**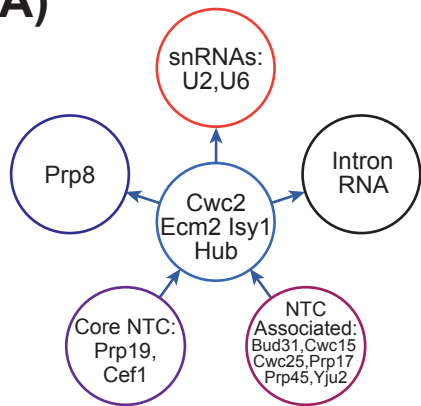**B)**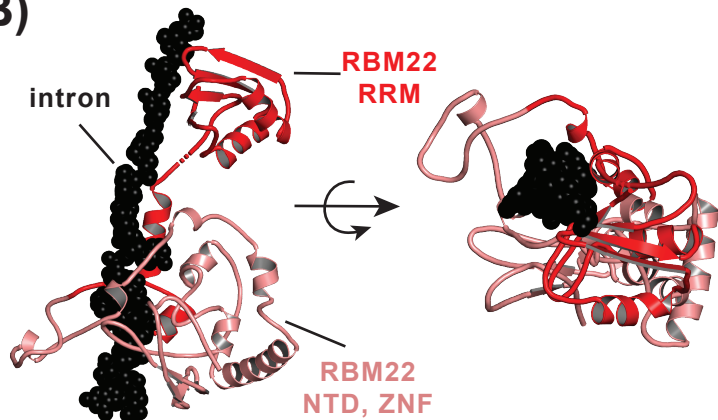**C)**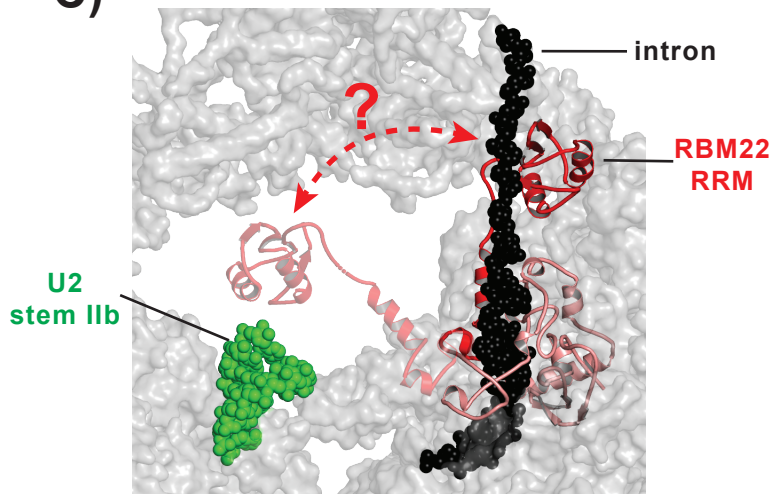

Source: https://biorxiv.org/content/10.1101/2020.09.05.284281v1.full.pdf
